# Supplementary material
Source: PubMed Central journal article supplement (PMC3667260)
Supplement: supp_jc.2013-1106_JC-13-1106_tab3.pdf [file supp_jc.2013-1106_JC-13-1106_tab3.pdf]

**Supplemental Table 1: Dose Escalation Schedule**

| <b>Dose Level</b> | <b>Minimum Number of Subjects</b> | <b>Efatutazone Dose</b> | <b>Paclitaxel Dose</b>                                   |
|-------------------|-----------------------------------|-------------------------|----------------------------------------------------------|
| -1 <sup>a</sup>   | 3                                 | 0.10 mg every 12 hours  | 135 mg/m <sup>2</sup> IV over 3 hours once every 3 weeks |
| 1a <sup>b</sup>   | 3                                 | 0.15 mg every 12 hours  | 135 mg/m <sup>2</sup> IV over 3 hours once every 3 weeks |
| 1b <sup>b</sup>   |                                   | 0.15 mg every 12 hours  | 175 mg/m <sup>2</sup> IV over 3 hours once every 3 weeks |
| 2                 | 3                                 | 0.30 mg every 12 hours  | 175 mg/m <sup>2</sup> IV over 3 hours once every 3 weeks |
| 3                 | 3                                 | 0.50 mg every 12 hours  | 175 mg/m <sup>2</sup> IV over 3 hours once every 3 weeks |

Abbreviations: IV = intravenous; DLT = dose-limiting toxicity; BID = twice daily; RP2D = recommended Phase dose.

- a: Dose Level -1 is included in case unexpected DLTs occur during treatment on Dose Level 1 (starting dose level).
- b: Subjects completing 1 cycle of treatment at Dose Level 1a were treated at Dose Level 1b in the second treatment cycle. The only difference between Dose Levels 1a and 1b was the dose of paclitaxel. Three patients received only dose level 1a and four received dose 1b.

**Supplemental Table 2: Instances of Edema and/or Swelling**

| <b>Indication</b>   | <b>Efatutazone (BID) Dose (mg)</b> | <b>CTCAE Grade</b> |
|---------------------|------------------------------------|--------------------|
| FACE EDEMA/SWELLING |                                    |                    |
| Subject 03          | 0.15                               | 2                  |
| Subject 05          | 0.15                               | 2                  |
| Subject 08          | 0.30                               | 1                  |
| LOCALIZED EDEMA     |                                    |                    |
| Subject 09          | 0.30                               | 3                  |
| JOINT SWELLING      |                                    |                    |
| Subject 08          | 0.30                               | 1                  |
| PERIPHERAL EDEMA    |                                    |                    |
| Subject 06          | 0.15                               | 2                  |
| Subject 09*         | 0.30                               | 1                  |
| Subject 09*         | 0.30                               | 1                  |
| Subject 09*         | 0.30                               | 2                  |
| Subject 05          | 0.15                               | 1                  |
| Subject 13          | 0.30                               | 3                  |
| Subject 15          | 0.30                               | 1                  |
| Subject 16          | 0.30                               | 1                  |

\*: Subject 09 had 3 events of peripheral edema.

Abbreviations: CTCAE = Common Terminology Criteria for Adverse Events
